# Supplementary material
Source: Research Square preprint supplement (doi:10.21203/rs.3.rs-9608506/v1)
Supplement: Supplementary file 1 [file 00edb513aa89de5360a9d48b.docx]

| **Table 1.**   | **Variables** | **n=88** | | --- | --- | | Age (y) | 67.1 ± 15,2 | | Gender |  | | Male | 55 (62.5) | | Etiology of CKD |  | | Diabetes Mellitus | 17 (19.3) | | Hypertension | 30 (34.1) | | Glomerulonephritis | 14 (15.9) | | Hereditary disease | 6 (6.8) | | Other | 17 (19.3) | | Unknown | 4 (4.5) | | Comorbidities |  | | Diabetes | 42 (19.3) | | Hypertension | 83 (94.3) | | HF | 49 (55.7) | | CAD | 32 (36.4) | | Diabetes | 42 (19.3) | | History of transplant | 5 (5.7) | | Smoking | 13 (14.8) | | Cancer | 16 (18.2) | | Dialysis modality |  | | HD | 70 (79.5) | | HDF | 18 (20.4) | |  |
| --- | --- | --- | --- | --- | --- | --- | --- | --- | --- | --- | --- | --- | --- | --- | --- | --- | --- | --- | --- | --- | --- | --- | --- | --- | --- | --- | --- | --- | --- | --- | --- | --- | --- | --- | --- | --- | --- | --- | --- | --- | --- | --- | --- | --- | --- | --- | --- |
|  |  |
