# Supplementary material
Source: Research Square preprint supplement (doi:10.21203/rs.3.rs-9608506/v1)
Supplement: Supplementary file 2 [file 1d0763d0c002ff3a4ee368b4.docx]

| **Table 4.**   | **Variables** | **n (%)** | | --- | --- | | Chest pain on dialysis or emergency room visit – n(%) |  | | 2020 (n=88) | 9 (10.2) | | 2021 (n=74) | 9 (12.1) | | 2022 (n=70) | 0 (0.0) | | Cardiovascular death within 2 years – n(%) |  | | Yes | 6 (6.8) | | Death within 2 years – n(%) |  | | Yes | 18 (20.5) | |  |
| --- | --- | --- | --- | --- | --- | --- | --- | --- | --- | --- | --- | --- | --- | --- | --- | --- | --- | --- | --- |
|  |  |
