# Supplementary material
Source: Research Square preprint supplement (doi:10.21203/rs.3.rs-9608506/v1)
Supplement: Supplementary file 3 [file 1dd2ac8e89e9ada4c4a028f2.docx]

| **Table 3.**   | **Variables** | **Pre-dialysis troponin levels 2020** | **p** | | --- | --- | --- | | **Spearman correlation coefficient** | | Hemoglobin 2020 | -0.112 | 0.299 | | Iron 2020 | -0.135 | 0.209 | | Transferrin saturation 2020 | -0.132 | 0.221 | | Ferritin 2020 | 0.088 | 0.416 | | Glycated Hemoglobin 2020 | 0.319 | 0.002 | | Hemoglobin 2021 | -0.132 | 0.300 | | Iron 2021 | 0.180 | 0.154 | | Transferrin saturation 2021 | 0.224 | 0.075 | | Ferritin 2021 | 0.267 | 0.033 | | Hemoglobin 2022 | 0.235 | 0.091 | | Iron 2022 | -0.126 | 0.370 | | Transferrin saturation 2022 | -0.008 | 0.953 | | Ferritin 2022 | 0.146 | 0.296 | | Glycated Hemoglobin 2022 | 0.328 | 0.016 | | PTH 2 years | -0.035 | 0.803 | | Ionic calcium 2 years | -0.224 | 0.108 | | Phosphorus 2 years | 0.074 | 0.598 | |  |
| --- | --- | --- | --- | --- | --- | --- | --- | --- | --- | --- | --- | --- | --- | --- | --- | --- | --- | --- | --- | --- | --- | --- | --- | --- | --- | --- | --- | --- | --- | --- | --- | --- | --- | --- | --- | --- | --- | --- | --- | --- | --- | --- | --- | --- | --- | --- | --- | --- | --- | --- | --- | --- | --- | --- | --- | --- |
|  |  |
