# Supplementary material
Source: Research Square preprint supplement (doi:10.21203/rs.3.rs-9608506/v1)
Supplement: Supplementary file 4 [file 24a2b9ff1ed4987882c09928.docx]

| **Table 6.**   | **Variables** | **Pre-dialysis Troponin 2020** | | | | --- | --- | --- | --- | | **<83.3**  **(n=60)** | **≥ 83.3**  **(n=28)** | **P** | | Chest pain on dialysis or emergency room visit in 2020 |  |  | 1.000 | | Yes | 6 (10.0) | 3 (10.7) |  | | Chest pain on dialysis or emergency room visit in 2021 |  |  | 1.000 | | Yes | 7 (14.0) | 2 (15.4) |  | | Cardiovascular death within 2 years |  |  |  | | Yes | 2 (3.3) | 4 (14.3) | 0.078 | | Death within 2 years |  |  |  | | Yes | 5 (7.3) | 15 (53.6) | <0.001 | |  |
| --- | --- | --- | --- | --- | --- | --- | --- | --- | --- | --- | --- | --- | --- | --- | --- | --- | --- | --- | --- | --- | --- | --- | --- | --- | --- | --- | --- | --- | --- | --- | --- | --- | --- | --- | --- | --- | --- | --- | --- | --- |
|  |  |
