# Supplementary material
Source: Research Square preprint supplement (doi:10.21203/rs.3.rs-9608506/v1)
Supplement: Supplementary file 5 [file 5077ff800c3510c745c2c44b.docx]

| **Table 7.**   | **Variables** | **Relative Risk* (IC 95%)** | **p** | | --- | --- | --- | | Cardiovascular death within 2y | 9.78 (2.83 – 33.9) | <0.001 | | Death within 2y | 6.00 (2.05 – 17.5) | 0.001 |   * adjusted for age, gender, glycated hemoglobin in 2020, iron, hypertension, diabetes, heart failure and coronary heart disease |  |
| --- | --- | --- | --- | --- | --- | --- | --- | --- | --- | --- |
|  |  |
