# Supplementary material
Source: Research Square preprint supplement (doi:10.21203/rs.3.rs-9608506/v1)
Supplement: Supplementary file 6 [file 5a538dbfb4c404d3e97b36f0.docx]

| **Table 2.**   | **Variables** | **2020 (n=88)** |  | **2021**  **(n=74)** |  | **2022**  **(n=70)** | | --- | --- | --- | --- | --- | --- | | Hemoglobin (g/dL) | 11.2±1,8 |  | 11.2±1,8 |  | 10.8±1,7 | | Iron (µg/dL) | 72.1±32.6 |  | 69,3±24.6 |  | 75.7±27.0 | | Transferrin saturation (%) | 35.4±13.4 |  | 34.9±13.2 |  | 39.8±12.7 | | Ferritin (ng/mL)  (P25-P75) | 480  (270-924) |  | 511  (211-1043) |  | 490  (228-1009) | | Glycated hemoglobin (%) | 5.72±1.33 |  | - |  | 5.57±1.19 | | Ionic calcium (mmol/L) | - |  | - |  | 1.25±0.13 | | Phosphorus (mg/dL) | - |  | - |  | 5.57±1.87 | | Pre Dialysis Troponin (ng/L)  (P25-P75) | 64.7  (36.9-91.8) |  | 59  (31.3-84.5) |  | 58  (35.5-90.8) | | Post Dialysis Troponin  (P25-P75) | 60.3  (33.8-83.0) |  | 51  (30.0-69.0) |  | - | | Troponin variation  (P25-P75) | -4.5  (-9.0-(-0.7) |  | -9.0  (-17-(-3) |  | - | |  |  |  |  |  |  | |  |
| --- | --- | --- | --- | --- | --- | --- | --- | --- | --- | --- | --- | --- | --- | --- | --- | --- | --- | --- | --- | --- | --- | --- | --- | --- | --- | --- | --- | --- | --- | --- | --- | --- | --- | --- | --- | --- | --- | --- | --- | --- | --- | --- | --- | --- | --- | --- | --- | --- | --- | --- | --- | --- | --- | --- | --- | --- | --- | --- | --- | --- | --- | --- | --- | --- | --- | --- | --- | --- | --- | --- | --- | --- | --- |
|  |  |
