# Supplementary material
Source: Research Square preprint supplement (doi:10.21203/rs.3.rs-9608506/v1)
Supplement: Supplementary file 7 [file e0468616f52882162bf980f0.docx]

| **Table 5.**   | **Variables** | **Pre-dialysis troponin levels in 2020** |  |  | **Troponin variation (post-pre dialysis) in 2020** |  | | --- | --- | --- | --- | --- | --- | | **Median (P25 – P75)** | **P** |  | **Median (P25 – P75)** | **P** | | Chest pain on dialysis or emergency room visit in 2020 |  | 0.158 |  |  | 0.173 | | No | 63 (33.3 – 92.3) |  |  | -3.7 (-9 – (0) |  | | Yes | 78 (59.5 – 103.7) |  |  | -6.3 (-11.5 – (-5) |  | | Chest pain on dialysis or emergency room visit in 2021 |  | 0.492 |  |  | 0.630 | | No | 59 (32.3 – 79.1) |  |  | -4 (-8 – (0) |  | | Yes | 68,7 (34.3 – 81.1) |  |  | -5.7 (-9.3 – (-0.33) |  | | Cardiovascular death within 2 years |  | 0.169 |  |  | 0.753 | | No | 64 (35.9 – 87.1) |  |  | -4.8 (-9.1 – (-0.5) |  | | Yes | 102.8 (40.8 – 213.7) |  |  | -3.6 (-8.1 – (-0.4) |  | | Death within 2 years |  | <0.001 |  |  | 0.244 | | No | 60.7 (30.3 – 77.3) |  |  | -4.3 (-8 – (-0.2) |  | | Yes | 102.8 (76.1 – 162.9) |  |  | -6.7 (-12.1 – (-3) |  | |  |
| --- | --- | --- | --- | --- | --- | --- | --- | --- | --- | --- | --- | --- | --- | --- | --- | --- | --- | --- | --- | --- | --- | --- | --- | --- | --- | --- | --- | --- | --- | --- | --- | --- | --- | --- | --- | --- | --- | --- | --- | --- | --- | --- | --- | --- | --- | --- | --- | --- | --- | --- | --- | --- | --- | --- | --- | --- | --- | --- | --- | --- | --- | --- | --- | --- | --- | --- | --- | --- | --- | --- | --- | --- | --- | --- | --- | --- | --- | --- | --- | --- | --- | --- | --- | --- |
|  |  |
